# Supplementary material
Source: Springer Nature journal article supplement (https://www.springermedizin.de/resource/supplementary/13045_2010_140_MOESM8_ESM.pdf/9660844)

**EM-2   KCL-22   NALM-1   SD-1   TOM-1**

**s**

**r**

**r**

**r**

**sr**

**-**

**+**

**-**

**+**

**-**

**+**

**-**

**+**

**-**

**+**

**imatinib**

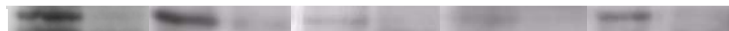

**pSTAT5**

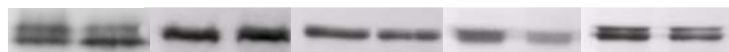

**STAT5**

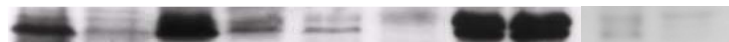

**pERK1/2**

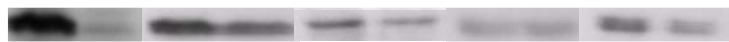

**pS6**

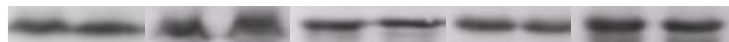

**S6**

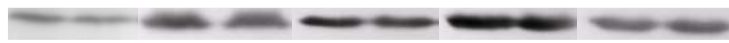

**GAPDH**

Supplement: MOESM8 [file 9660844]
